# Supplementary material for: Environmental DNA metabarcoding reveals spatial and seasonal patterns in the fish community in the Venice Lagoon
Source: Frontiers journal article supplement (doi:10.3389/fmars.2022.1009490), 2022-11-17
Supplement: Table_4.xlsx [file Table_4.xlsx]

## Sheet: table_S4
Table S4. Table reporting the eDNA samples, with location, station, and date of collection. Also reported are the season of collection, the unique filter identifier (N=81), the volume filtered, the unique eDNA library identifier (N=101) and the list of OTUs detected after ASVs taxonomic assignment through the QIIME2 pipeline (Bolyen et al., 2019) and the genetic database Mitohelper (Lim and Thomp…
location	station	date	season	period	id_filter	filter_type	filtred_vol_lt	id_eDNA_lib	Abramis.brama	Alburnus.arborella	Alosa.fallax	Anguilla.anguilla	Atherina	Atherina.boyeri	Blicca.bjoerkna	Buglossidium.luteum	Carassius	Chelon	Chelon.auratus	Clupea.harengus	Conger.conger	Cyprinus.carpio	Dicentrarchus.labrax	Diplodus.sargus	Engraulis.encrasicolus	Esox.lucius	Gambusia.holbrooki	Gobius.cobitis	Gobius.paganellus	Hippocampus.guttulatus	Isurus.oxyrinchus	Lagocephalus.lagocephalus	Lepidotrigla	Lophius.budegassa	Merlangius.merlangus	Micromesistius.poutassou	Mugil.cephalus	Mullus.barbatus	Mustelus.mustelus	Myliobatidae	Oncorhynchus.mykiss	Padogobius.martensii	Pleuronectes.platessa	Pomatomus.saltatrix	Pomatoschistus.microps	Pomatoschistus.minutus	Pseudorasbora.parva	Raja	Rhodeus.sericeus
North	5	2019-03-14	Winter	W+F	N_23	GF/C	4.2	25	0	0	0	856.5	0	102372	0	0	0	109446	3981.5	0	0	0	2713.5	0	0	0	0	0	4	0	0	0	0	0	0	133	0	0	0	0	0	0	1416.5	0	6886	21819.5	0	0	0
North	5	2019-03-14	Winter	W+F	N_24	GF/C	4	26	0	0	0	1269.5	0	80827.5	0	0	0	2764	1978.5	0	0	85.5	2527.5	15.5	3413.5	0	0	0	0	0	0	0	0	0	0	0	0	0	0	0	0	0	0	0	4255	4599.5	0	0	0
North	5	2019-03-14	Winter	W+F	N_25	cellulose	2.1	27	0	0	0	0	0	27331.5	0	0	0	17464	1369.5	0	0	0	5695.5	0	0	0	0	0	2	0	0	0	0	0	0	0	0	0	0	0	0	0	0	0	1937	0	0	0	0
North	5	2019-03-14	Winter	W+F	N_26	cellulose	2.1	28	0	0	10	0	0	3656.5	0	0	0	8818	1.5	0	0	0	1052.5	0	0	0	0	0	1	0	0	0	0	0	0	0	0	18.5	0	0	2226	0	9.5	0	0	3877.5	0	0	0
North	5	2019-04-12	Spring	S+S	N_27	GF/C	3	29	0	0	0	816.5	0	270256	0	0	1197	17624	29794.5	0	0	658.5	1322.5	0	2277.5	0	0	0	0	0	0	0	0	0	0	0	0	0	0	0	396	599	18797.5	0	491	4168.5	0	0	0
North	5	2019-04-12	Spring	S+S	N_28	cellulose	1	30	0	0	0	0	0	192482	0	0	0	17113	25552.5	0	0	0	3484.5	0	1991.5	0	0	0	11	0	0	0	0	0	0	0	0	17.5	0	0	16	0	81.5	0	1633	20821.5	0	0	0
North	5	2019-04-12	Spring	S+S	N_29	GF/C	3	31	0	0	0	0	0	255766	10	0	0	23456	26439.5	0	0	0	3355.5	0	0	0	0	0	11	0	0	0	0	0	0	0	0	0	0	0	2615	2616	1139.5	0	0	5273.5	0	0	0
North	5	2019-04-12	Spring	S+S	N_30	cellulose	1	32	0	0	0	0	0	21460.5	0	0	0	205	5918.5	0	0	0	788.5	0	0	0	0	0	0	0	0	0	0	0	0	0	0	0	0	0	0	13	768.5	0	2192	6754.5	0	0	0
North	5	2019-05-16	Spring	S+S	N_45	GF/C	3	38	0	1954	0	0	0	30460.5	0	0	2114	14126	998.5	0	0	135.5	1174.5	0	0	0	0	0	0	0	0	0	0	0	0	0	0	0	0	0	133	1027	0	0	0	1840.5	2336.5	0	2670.5
North	5	2019-05-16	Spring	S+S	N_46	GF/C	3.13	39	0	3158	0	0	0	58020.5	0	0	0	22156	10134.5	0	0	4285.5	0	0	0	0	0	0	0	0	0	0	0	0	0	0	1739	0	0	0	0	0	0	0	0	6029.5	1177.5	0	0
North	5	2019-05-16	Spring	S+S	N_49	cellulose	1.15	42	0	0	0	0	0	44973.5	0	0	0	4072	7296.5	0	0	0	0	0	0	0	0	0	0	0	0	0	0	0	0	0	0	0	0	0	0	0	0	0	0	1992.5	0	0	0
North	5	2019-05-16	Spring	S+S	N_50	cellulose	1.1	43	1779	0	0	0	0	52837.5	0	0	865	0	3014.5	0	0	0	0	0	0	0	0	0	7	0	0	0	0	0	0	0	0	37.5	0	0	0	0	0	0	0	0	0	0	0
North	5	2019-06-12	Spring	S+S	N_51	GF/C	3	44	0	0	0	0	0	54338.5	0	0	0	33608	47196.5	0	0	0	0	0	0	0	0	0	3457	0	0	0	0	0	0	0	0	9.5	0	0	0	0	0	0	0	13530.5	0	0	0
North	5	2019-06-12	Spring	S+S	N_52	cellulose	1.2	45	0	0	0	0	0	14114.5	0	0	0	3936	8448.5	0	0	0	0	0	0	0	0	0	0	0	0	0	0	0	0	0	0	0	0	0	0	0	0	0	0	0	0	0	0
North	5	2019-06-12	Spring	S+S	N_53	GF/C	2.15	46	0	0	0	0	0	12823.5	0	0	0	0	10437.5	0	0	0	3011.5	0	0	0	0	0	0	0	0	0	0	0	0	0	0	0	0	0	0	0	0	0	0	0	0	0	0
North	5	2019-06-12	Spring	S+S	N_54	cellulose	1.3	47	0	0	0	0	0	24080.5	0	0	0	0	33754.5	0	0	0	1345.5	0	0	0	0	0	0	0	0	0	0	0	0	0	0	15.5	0	0	0	0	4690.5	0	0	3187.5	0	0	0
North	5	2019-07-08	Summer	S+S	N_55	GF/C	1.25	48	0	0	0	0	0	28166.5	0	0	0	22014	31141.5	0	0	0	0	0	0	0	0	0	0	0	0	0	0	0	0	1088	0	0	0	0	0	0	7.5	0	2382	5284.5	0	0	0
North	5	2019-07-08	Summer	S+S	N_56	GF/C	1.33	49	0	0	0	0	0	49509.5	0	0	0	50020	34379.5	0	0	0	0	13.5	0	0	0	0	0	0	0	0	0	0	0	0	0	3.5	0	0	0	0	0	0	0	6336.5	0	0	0
North	5	2019-07-08	Summer	S+S	N_57	cellulose	1.05	50	0	0	0	0	0	10135.5	0	0	0	14180	10933.5	0	0	0	0	0	0	0	0	0	0	0	0	0	0	0	0	0	0	11.5	0	0	0	0	0	0	0	0	0	0	0
North	5	2019-07-08	Summer	S+S	N_58	cellulose	0.5	51	0	0	0	0	0	20388.5	0	0	0	27218	15764.5	0	0	0	0	0	878.5	0	0	0	0	0	0	0	0	0	0	0	0	0	0	0	0	0	0	0	0	556.5	0	0	0
North	5	2019-07-08	Summer	S+S	N_59	GF/C	2.15	52	0	0	0	0	0	23980.5	0	0	0	13221	9652.5	0	0	0	0	0	0	0	0	0	0	0	0	0	0	0	0	0	0	0	0	0	0	0	0	0	0	1072.5	0	0	0
North	5	2019-07-08	Summer	S+S	N_60	GF/C	1.3	53	0	0	0	0	0	35612.5	0	0	0	54141	21745.5	0	0	0	0	0	0	0	0	0	0	0	0	0	0	0	0	0	0	0	0	0	0	0	0	0	0	0	0	0	0
North	5	2019-07-08	Summer	S+S	N_61	cellulose	0.5	54	0	0	0	0	0	8895.5	0	0	0	13730	4130.5	0	0	0	0	0	0	0	0	0	0	0	0	0	0	0	0	0	0	3.5	0	0	0	0	1.5	0	0	1231.5	0	0	0
North	5	2019-07-08	Summer	S+S	N_62	cellulose	0.5	55	0	0	0	0	0	18378.5	0	0	0	31394	8564.5	0	0	0	0	0	0	0	0	0	0	0	0	0	0	0	0	0	0	0	0	0	0	0	0	0	0	2482.5	0	0	0
North	5	2019-08-22	Summer	S+S	N_63	GF/C	1.1	56	0	0	0	0	0	16282.5	0	0	0	14205	8275.5	0	0	0	1447.5	0	0	0	0	0	0	0	0	0	0	0	0	0	0	0	0	0	0	0	37.5	0	0	0	0	0	0
North	5	2019-08-22	Summer	S+S	N_64	GF/C	1.15	57	0	0	0	0	0	3609.5	0	0	0	1465	3224.5	0	0	0	412.5	0	0	0	0	0	0	0	0	0	0	0	0	0	0	0	0	0	0	0	11508.5	0	742	0	0	0	0
North	5	2019-08-22	Summer	S+S	N_65	cellulose	0.18	58	0	0	0	0	0	1616.5	0	0	0	0	1630.5	0	0	0	0	0	0	0	0	0	0	0	0	0	0	0	0	0	0	0	0	0	0	0	0	0	0	0	0	0	0
North	5	2019-08-22	Summer	S+S	N_66	cellulose	0.15	59	0	0	20	0	0	0	0	0	0	0	0	0	0	0	0	0	0	0	0	7.5	0	0	0	0	0	0	16	0	0	105.5	0	0	0	0	43.5	0	0	0	0	0	0
North	5	2019-09-23	Fall	W+F	N_88	GF/C	2.03	66	0	0	0	0	0	0	0	0	0	24726	0	0	0	0	278.5	0	0	0	0	0	20012	0	0	0	0	0	0	0	0	0	0	0	109	0	0	0	14630	0	0	0	0
North	5	2019-09-23	Fall	W+F	N_88	GF/C	2.03	67	0	424	0	24.5	0	1067.5	0	0	163	73043	7290.5	0	0	0	14480.5	0	0	0	0	0	0	0	0	0	0	0	0	0	0	0	0	0	27	0	0	0	102	0	59.5	0	135.5
North	5	2019-09-23	Fall	W+F	N_89	cellulose	1.03	68	0	0	0	0	0	0	0	0	0	29650	60.5	0	0	0	20149.5	0	0	0	0	0	0	0	0	0	0	0	0	0	54	0	0	0	0	0	0	0	0	0	0	0	0
North	5	2019-09-23	Fall	W+F	N_89	cellulose	1.03	69	0	4	0	0	0	0	0	0	0	3986	101.5	0	0	20.5	12513.5	0	29.5	0	0	0	0	0	0	0	0	0	0	0	0	0	0	0	163	0	9.5	0	116	0	0	0	0
North	5	2019-09-23	Fall	W+F	N_90	cellulose	1.1	70	0	0	0	0	0	0	0	54	0	52954	453.5	0	0	0	57560.5	0	0	0	0	0	86	0	0	27	0	0	0	0	0	0	0	0	0	0	0	0	16257	0	0	0	13.5
North	5	2019-09-23	Fall	W+F	N_90	cellulose	1.1	71	0	0	0	0	0	348.5	0	0	0	140892	209.5	0	0	0	226912	0	151.5	0	0	118.5	0	0	0	0	0	0	68	0	0	45.5	0	0	0	0	0	0	0	0	0	0	0
North	5	2019-10-08	Fall	W+F	N_95	GF/C	3	72	0	17	0	0	0	11498.5	0	81	0	216785	20081.5	0	0	0	3994.5	0	0	0	0	0	0	0	0	0	0	0	0	0	6416	0	0	0	0	0	0	0	3276	0	0	0	0
North	5	2019-10-08	Fall	W+F	N_95	GF/C	3	73	0	0	0	5070.5	0	29810.5	0	0	0	779939	32777.5	0	0	6.5	34202.5	0	0	0	0	50.5	0	0	0	0	0	0	0	0	0	0	0	0	6972	0	0	0	0	0	0	0	54.5
North	5	2019-10-08	Fall	W+F	N_96	GF/C	3.1	74	0	85	0	0	0	8460.5	0	41	0	290779	16704.5	0	0	0	23378.5	0	0	0	0	0	86	0	0	0	0	0	0	0	41	3328.5	0	0	0	0	0	0	0	2788.5	0	0	0
North	5	2019-10-08	Fall	W+F	N_96	GF/C	3.1	75	0	99	0	0	0	10698.5	0	3079	0	344372	25534.5	0	0	74.5	23337.5	0	0	0	0	11485.5	0	0	0	0	0	0	0	0	0	0	0	0	0	0	0	0	3819	0	0	0	40.5
North	5	2019-10-08	Fall	W+F	N_97	cellulose	1.3	76	0	0	0	0	0	3387.5	0	7094	0	117317	426.5	0	0	0	413.5	0	0	0	0	0	154	0	0	41	0	0	0	0	0	0	0	0	298	0	0	0	6328	0	0	0	0
North	5	2019-10-08	Fall	W+F	N_97	cellulose	1.3	77	0	0	0	51.5	0	0	0	0	0	24156	643.5	0	0	0	1010.5	0	0	0	0	118.5	0	0	0	0	0	0	0	0	0	0	0	0	0	0	0	0	0	0	0	0	0
North	5	2019-10-08	Fall	W+F	N_98	cellulose	1.2	78	0	166	0	0	0	1786.5	0	6945	0	111660	10790.5	0	0	0	7128.5	0	0	0	95	0	59	0	0	4666	0	0	0	0	0	3613.5	0	0	0	0	0	0	48	4348.5	0	0	67.5
North	5	2019-10-08	Fall	W+F	N_98	cellulose	1.2	79	0	180	0	0	0	4798.5	0	0	0	142384	11210.5	0	0	88.5	861.5	0	0	0	122	91.5	0	0	0	0	0	0	0	1655	0	21219.5	0	0	81	0	0	0	0	0	0	0	189.5
North	5	2019-11-04	Fall	W+F	N_103	GF/C	3	80	0	0	27	0	0	0	0	0	0	6211	0	0	0	0	0	0	0	0	0	0	0	0	0	0	0	0	0	0	0	0	0	0	0	0	0	0	0	0	0	0	0
North	5	2019-11-04	Fall	W+F	N_103	GF/C	3	81	0	31	0	0	0	0	0	0	0	0	0	0	0	34.5	440.5	0	70.5	0	0	0	0	0	0	0	0	0	0	0	0	0	0	0	0	0	0	0	34	0	0	0	0
North	5	2019-11-04	Fall	W+F	N_107	cellulose	1	86	0	0	0	0	0	0	0	0	0	13020	0	0	0	0	9447.5	0	2.5	0	0	0	0	0	0	0	0	0	0	0	0	0	0	0	0	0	0	0	0	0	0	0	0
North	5	2019-11-04	Fall	W+F	N_107	cellulose	1	87	0	0	0	0	0	3617.5	0	0	0	229	0	0	41	0	25046.5	0	151.5	0	0	0	0	0	0	0	0	0	0	0	0	59.5	0	0	0	0	0	0	0	7.5	0	0	0
North	5	2019-11-04	Fall	W+F	N_108	cellulose	1.1	88	0	0	0	0	0	15052.5	0	0	0	0	0	0	0	4428.5	0	0	0	0	0	0	0	0	0	0	0	0	0	0	0	0	0	0	0	0	0	705	0	0	0	0	0
North	5	2019-11-04	Fall	W+F	N_108	cellulose	1.1	89	0	0	0	0	0	60045.5	0	0	0	20168	5906.5	0	0	0	50073.5	0	43.5	0	0	0	0	0	0	0	0	0	41	0	0	59.5	0	0	0	0	0	0	0	0	0	0	0
North	5	2019-12-04	Fall	W+F	N_115	GF/C	3.1	94	0	0	0	0	0	45016.5	0	0	3934	20738	6137.5	0	0	4144.5	0	0	0	0	0	0	0	0	0	0	0	0	0	0	0	0	0	0	488	0	0	0	42464	12188.5	3179.5	0	0
North	5	2019-12-04	Fall	W+F	N_115	GF/C	3.1	95	0	15643	0	13738.5	0	43958.5	0	0	21391	13006	0	0	0	32005.5	0	0	0	34047	1818	0	0	0	0	0	0	0	0	0	0	0	0	0	244	0	0	0	79780	21466.5	25126.5	0	22978.5
North	5	2019-12-04	Fall	W+F	N_116	GF/C	2.5	96	0	9757	0	0	0	26813.5	0	0	3812	9927	0	0	0	2068.5	6571.5	0	0	0	0	0	0	0	0	0	0	0	0	0	0	0	217	0	9414	0	0	0	13016	5664.5	9513.5	0	5846.5
North	5	2019-12-04	Fall	W+F	N_116	GF/C	2.5	97	0	31	0	10320.5	0	54226.5	0	0	0	107984	37199.5	0	0	20611.5	33361.5	0	0	95	27	0	0	0	0	0	0	0	0	0	0	0	0	0	76775	0	0	0	30554	28031.5	59.5	0	24036.5
North	5	2019-12-04	Fall	W+F	N_117	cellulose	1	98	0	4059	0	0	0	9559.5	0	0	0	3471	7263.5	0	0	47.5	0	0	0	0	0	0	0	0	0	0	0	0	0	0	0	0	0	0	0	0	0	0	184	21.5	181.5	0	0
North	5	2019-12-04	Fall	W+F	N_117	cellulose	1	99	0	24311	0	65.5	0	0	0	0	0	32987	0	0	0	47.5	0	0	0	0	54	0	0	0	0	0	0	0	0	0	0	0	0	0	244	0	0	0	89	12459.5	0	0	67.5
North	5	2019-12-04	Fall	W+F	N_118	cellulose	1	100	0	5619	0	0	0	24357.5	0	0	0	26937	0	0	0	3370.5	7657.5	0	0	0	0	23.5	0	0	0	0	0	0	0	0	0	0	0	0	0	0	0	0	4673	0	4237.5	0	0
North	5	2019-12-04	Fall	W+F	N_118	cellulose	1	101	0	153	0	133.5	0	86198.5	0	0	0	20792	0	0	0	115.5	33.5	0	0	12086	41	0	0	0	0	0	0	0	0	0	0	0	0	0	0	0	0	0	156	16298.5	194.5	0	122.5
South	15	2019-03-08	Winter	W+F	S_1	GF/C	4	1	0	0	9179	0	0	11966.5	0	0	1007	0	0	0	0	0	5510.5	0	1995.5	0	0	3755.5	0	0	0	2570	0	752	4589	0	0	56100.5	0	0	0	0	2328.5	0	0	0	0	12	0
South	15	2019-03-08	Winter	W+F	S_2	GF/C	2.3	2	0	0	38	0	0	0	0	0	11	0	0	0	0	0	983.5	0	1415.5	0	0	0	0	0	0	0	0	700	27	0	0	4380.5	0	0	0	0	2237.5	0	0	0	0	0	0
South	15	2019-03-08	Winter	W+F	S_3	GF/C	4	3	0	0	49	0	0	0	0	0	17	3662	1702.5	0	0	0	0	0	3165.5	0	0	1777.5	0	0	0	14	0	2079	31	0	0	51666.5	558	0	0	0	46.5	0	0	0	0	1828	0
South	15	2019-03-08	Winter	W+F	S_4	GF/C	1.5	4	0	0	38	0	0	3064.5	0	0	0	3557	0	0	0	0	945.5	0	1947.5	0	0	9.5	0	0	0	12	1777	3187	31	2537	0	55845.5	0	0	0	0	1337.5	0	0	0	0	1548	0
South	15	2019-03-08	Winter	W+F	S_5	GF/C	4.5	5	0	0	40	0	0	96065.5	0	0	0	0	957.5	0	0	0	0	0	777.5	0	0	14.5	0	0	0	228	0	0	386	0	0	1942.5	194	0	0	0	234.5	0	686	17.5	0	127	0
South	15	2019-03-08	Winter	W+F	S_5	GF/C	4.5	6	0	194	529	0	0	633.5	0	0	0	9100	0	0	0	20.5	1553.5	0	0	0	0	0	0	0	0	0	0	7501	176	0	0	0	678	0	0	0	64.5	0	116	0	0	0	257.5
South	15	2019-03-08	Winter	W+F	S_5	GF/C	4.5	7	0	560	0	0	0	8772.5	0	0	0	11324	141.5	0	0	291.5	155.5	0	0	0	0	37.5	0	0	0	0	0	0	420	0	0	0	3947	0	0	0	64.5	0	0	468.5	0	0	244.5
South	15	2019-03-08	Winter	W+F	S_6	cellulose	3.39	8	0	0	843	0	0	14214.5	0	0	0	0	0	0	0	0	1522.5	0	0	0	0	11.5	0	0	0	0	0	17	226	0	0	2709.5	0	0	0	0	0	0	219	0	0	0	0
South	15	2019-03-08	Winter	W+F	S_7	GF/C	4	9	0	0	25	0	0	0	0	0	0	0	0	0	0	0	0	0	0	0	0	0	0	0	0	0	0	11	12	0	0	171.5	0	0	0	0	38.5	0	0	0	0	0	0
South	15	2019-03-08	Winter	W+F	S_8	cellulose	1.5	10	0	0	0	0	0	0	0	0	0	0	0	0	0	0	0	0	0	0	0	0	3	0	0	0	0	0	0	0	0	0	0	0	0	0	1921.5	0	0	0	0	0	0
South	15	2019-03-08	Winter	W+F	S_9	GF/C	4.5	11	0	0	0	0	0	92.5	0	0	0	0	0	0	0	0	0	0	0	0	0	0	0	0	0	0	0	0	0	0	0	15.5	0	0	0	0	21.5	0	0	0	0	0	0
South	15	2019-03-08	Winter	W+F	S_10	cellulose	3.5	12	0	0	0	0	0	52.5	0	0	0	0	0	0	0	0	0	0	0	0	0	0	16	0	0	0	0	0	10	0	0	7.5	0	0	0	0	14.5	0	0	0	0	0	0
South	15	2019-03-08	Winter	W+F	S_11	GF/C	4	13	0	0	0	0	0	0	0	0	0	0	0	0	0	0	0	0	0	0	0	0	710	0	0	0	0	0	0	0	0	0	0	0	0	0	13.5	0	0	0	0	0	0
South	15	2019-03-08	Winter	W+F	S_12	cellulose	1.5	14	0	0	0	0	0	728.5	0	0	0	0	0	0	0	0	0	0	0	0	0	0	0	0	0	0	0	0	0	0	0	0	0	0	0	0	0	0	0	0	0	0	0
South	15	2019-03-08	Winter	W+F	S_13	GF/C	4.5	15	0	0	0	0	0	1218.5	0	0	0	0	0	0	0	0	0	0	478.5	0	0	0	421	0	0	0	0	0	310	17	0	0	0	0	0	0	2976.5	0	0	0	0	0	0
South	15	2019-03-08	Winter	W+F	S_14	cellulose	3.5	16	0	0	0	0	0	6481.5	0	0	0	0	0	0	0	0	0	33.5	0	0	0	0	1503	0	0	0	0	0	2110	0	0	0	0	0	0	0	294.5	0	0	0	0	0	0
South	15	2019-03-08	Winter	W+F	S_15	GF/C	4.5	17	0	0	17	0	0	0	0	0	0	0	0	0	0	0	0	54.5	0	0	0	0	0	0	0	0	0	0	942	0	0	58.5	0	0	0	0	0	0	0	0	0	0	0
South	15	2019-03-08	Winter	W+F	S_16	cellulose	1.5	18	0	0	0	0	0	0	0	0	0	0	0	0	0	0	0	60.5	0	0	0	0	0	0	0	0	0	0	15	0	0	2662.5	0	0	0	0	6637.5	0	0	0	0	0	0
South	15	2019-03-08	Winter	W+F	S_17	GF/C	4.5	19	0	0	0	0	0	0	0	0	0	0	0	454	0	0	276.5	57.5	0	0	0	0	4	0	0	0	0	0	15	0	0	57.5	0	0	0	0	1336.5	0	0	0	0	99	0
South	15	2019-03-08	Winter	W+F	S_18	cellulose	3.25	20	0	0	0	0	0	638.5	0	0	0	0	0	0	0	0	0	53.5	0	0	0	0	12	0	0	0	0	0	0	0	0	0	0	0	0	0	29.5	0	0	0	0	122	0
South	15	2019-03-14	Winter	W+F	S_19	GF/C	4.5	21	0	0	0	1152.5	0	0	0	0	0	3539	0	0	0	0	18160.5	0	7838.5	0	0	0	14	0	0	0	0	0	0	0	0	0	1779	0	0	0	0	0	0	0	0	0	0
South	15	2019-03-14	Winter	W+F	S_20	GF/C	4.5	22	0	0	0	2705.5	0	20809.5	0	0	0	0	0	0	0	0	0	0	0	0	0	0	0	0	0	0	0	0	0	0	0	6.5	0	0	0	0	0	0	0	0	0	0	0
South	15	2019-03-14	Winter	W+F	S_21	cellulose	3.5	23	0	0	0	17.5	0	1692.5	0	0	0	0	0	0	0	0	0	0	0	0	0	0	5048	0	0	0	0	0	0	0	0	0	0	0	0	0	10.5	0	0	0	0	0	0
South	15	2019-03-14	Winter	W+F	S_22	cellulose	2.4	24	0	0	0	17.5	0	0	0	0	0	0	0	0	0	0	0	0	0	0	0	0	0	0	0	0	0	0	0	0	0	0	0	0	0	0	0	0	8	106.5	0	0	0
South	15	2019-04-17	Spring	S+S	S_31	GF/C	4.1	33	0	0	1419	0	0	9432.5	1389	0	0	0	17548.5	0	0	0	1552.5	0	4037.5	0	0	0	3374	0	0	0	0	0	0	0	0	0	0	0	0	0	692.5	0	0	0	0	0	0
South	15	2019-04-17	Spring	S+S	S_32	GF/C	4	34	0	0	0	0	0	13863.5	0	0	0	0	29063.5	0	0	0	0	0	4859.5	0	0	0	1437	0	0	0	0	0	0	0	0	0	640	596	0	0	1449.5	0	0	0	0	0	0
South	15	2019-04-17	Spring	S+S	S_33	cellulose	1.5	35	0	0	19	0	0	8392.5	0	0	0	0	5868.5	0	0	0	0	0	1685.5	0	0	0	0	0	0	0	0	0	16	0	0	84.5	0	0	1479	0	0	0	0	0	0	0	0
South	15	2019-05-16	Spring	S+S	S_43	GF/C	3.2	36	0	0	0	0	0	19329.5	0	0	0	0	0	0	0	0	0	0	0	0	0	0	0	0	0	0	0	0	0	0	0	0	0	0	0	0	0	0	0	0	0	0	0
South	15	2019-05-16	Spring	S+S	S_44	GF/C	4	37	0	0	0	0	0	92042.5	0	0	0	0	43.5	0	0	0	0	0	0	0	0	0	14	0	0	0	0	12	0	0	0	79.5	0	0	0	0	0	0	0	0	0	0	0
South	15	2019-05-16	Spring	S+S	S_47	cellulose	1.5	40	0	0	0	0	0	15840.5	0	0	0	0	0	0	0	0	0	0	0	0	0	0	0	0	0	0	0	0	0	0	0	0	0	0	0	0	0	0	0	0	0	0	0
South	15	2019-05-16	Spring	S+S	S_48	cellulose	1.5	41	0	0	0	0	0	8078.5	0	0	0	0	0	0	0	0	0	0	0	0	0	0	0	0	0	0	0	0	0	0	0	16.5	0	0	0	0	2905.5	0	0	0	0	0	0
South	15	2019-08-22	Summer	S+S	S_67	GF/C	3	60	0	0	0	0	0	10286.5	0	0	0	0	7627.5	0	0	0	0	287.5	1080.5	0	0	0	0	0	0	0	0	0	0	0	0	715.5	899	0	0	0	0	0	0	0	0	0	0
South	15	2019-08-22	Summer	S+S	S_68	GF/C	2.43	61	19	0	0	0	0	14599.5	0	0	23	0	4349.5	0	0	0	870.5	0	0	0	0	0	0	0	0	0	0	0	0	0	0	105.5	0	0	0	0	0	0	0	0	0	0	0
South	15	2019-08-22	Summer	S+S	S_69	cellulose	1.13	62	0	0	0	0	0	0	0	0	0	0	944.5	0	0	0	0	0	0	0	0	0	90	0	0	0	0	0	0	0	0	121.5	0	0	0	0	0	0	0	224.5	0	0	0
South	15	2019-08-22	Summer	S+S	S_70	cellulose	1.15	63	0	0	0	0	0	0	0	0	0	0	0	0	0	0	0	0	0	0	0	0	0	0	0	0	0	0	0	0	0	0	0	0	0	0	1597.5	0	0	0	0	0	0
South	15	2018-11-13	Fall	W+F	S_71	GF/C	1.5	64	0	0	182	16.5	0	12235.5	0	0	0	0	0	0	214	0	10553.5	60.5	3316.5	0	0	739.5	0	181	366	0	0	0	0	0	0	549.5	122	0	0	0	0	0	19	0	0	0	0
South	15	2018-11-13	Fall	W+F	S_79	cellulose	1.5	65	0	0	32	0	0	0	0	0	0	0	0	0	36	0	28.5	22.5	67.5	0	0	54.5	0	41	68	0	0	0	0	0	0	0	0	0	0	0	13.5	0	0	0	0	0	0
South	15	2019-11-04	Fall	W+F	S_105	GF/C	3.3	82	0	0	0	0	0	6629.5	0	0	0	12871	0	0	0	0	0	0	16.5	0	0	0	0	0	0	0	0	0	0	0	0	0	0	0	0	0	0	0	0	0	0	0	0
South	15	2019-11-04	Fall	W+F	S_105	GF/C	3.3	83	0	0	0	0	0	27613.5	0	0	0	10782	0	0	27	0	52813.5	0	151.5	0	0	0	0	0	0	0	0	0	0	0	0	72.5	0	0	41	0	0	0	116	0	0	0	0
South	15	2019-11-04	Fall	W+F	S_106	GF/C	4	84	0	0	0	0	0	46061.5	0	0	0	1612	0	0	0	0	3818.5	0	3380.5	0	0	0	0	0	0	0	0	0	0	0	0	1564.5	0	0	0	0	0	0	0	0	0	0	0
South	15	2019-11-04	Fall	W+F	S_106	GF/C	4	85	0	0	0	0	2075	248090	0	0	0	25336	24069.5	0	7569	0	51809.5	0	28528.5	0	0	281.5	0	0	0	0	0	0	68	0	0	13501.5	0	0	0	0	0	0	0	0	0	0	0
South	15	2019-11-04	Fall	W+F	S_109	cellulose	1	90	0	0	0	0	0	0	0	0	0	0	0	0	0	0	0	0	0	0	0	0	0	0	0	0	0	27	0	0	0	0	0	0	0	0	0	0	0	0	0	0	0
South	15	2019-11-04	Fall	W+F	S_109	cellulose	1	91	0	0	0	0	0	92003.5	0	0	0	0	0	0	0	0	373.5	0	57.5	0	0	0	0	0	0	0	0	0	0	0	0	45.5	0	0	0	0	0	0	0	0	0	0	27.5
South	15	2019-11-04	Fall	W+F	S_110	cellulose	1	92	0	0	3133	0	0	2329.5	0	0	0	0	1986.5	0	0	20.5	0	0	0	0	0	186.5	0	0	0	0	0	0	0	0	0	0	0	0	0	0	0	0	0	0	0	0	27.5
South	15	2019-11-04	Fall	W+F	S_110	cellulose	1	0	0	0	0	0	46779.5	0	0	0	812	236.5	0	0	0	28207.5	0	138.5	0	0	552.5	0	0	0	0	0	0	0	0	0	222.5	0	0	0	0	0	0	0	0	0	0	0	0
[truncated: 21 more columns]

## Sheet: Sheet1
4.2
4
2.1
2.1
3
1
3
1
3
3.13
1.15
1.1
3
1.2
2.15
1.3
1.25
1.33
1.05
0.5
2.15
1.3
0.5
0.5
1.1
1.15
0.18
0.15
2.03
2.03
1.03
1.03
1.1
1.1
3
3
3.1
3.1
1.3
1.3
1.2
1.2
3
3
1
1
1.1
1.1
3.1
3.1
2.5
2.5
1
1
1
1
4
2.3
4
1.5
4.5
4.5
4.5
3.39
4
1.5
4.5
3.5
4
1.5
4.5
3.5
4.5
1.5
4.5
3.25
4.5
4.5
3.5
2.4
4.1
4
1.5
3.2
4
1.5
1.5
3
2.43
1.13
1.15
1.5
1.5
3.3
3.3
4
4
1
1
1
1
